# Supplementary material for: Urinary Biomarkers in Screening for the Usual Intake of Fruit and Vegetables, and Sodium, Potassium, and the Sodium-to-Potassium Ratio: Required Number and Accuracy of Measurements
Source: MDPI journal article supplement (doi:10.3390/nu16030442), 2024-02-01
Supplement: s1 [file s1]

Table S1. AUC (95% CI) of ROC curves of one-time 24-hour urinary sodium and potassium excretion and Na/K ratio in one-time 24-hour urinary collection to detect those with deviating intakes of sodium, potassium, or Na/K measured by 12-day WFR using other criteria

| Criteria                              | Men (n = 80)   |             |                    |                 |      |      |      |      | Women (n = 122) |             |                    |                 |      |      |      |      |
|---------------------------------------|----------------|-------------|--------------------|-----------------|------|------|------|------|-----------------|-------------|--------------------|-----------------|------|------|------|------|
|                                       | n <sup>a</sup> | AUC         | 95% CI             | CO <sup>b</sup> | Se   | Spe  | YI   | DC   | n <sup>a</sup>  | AUC         | 95% CI             | CO <sup>b</sup> | Se   | Spe  | YI   | DC   |
| <b>Sodium</b> (in salt equivalent, g) |                |             |                    |                 |      |      |      |      |                 |             |                    |                 |      |      |      |      |
| <7.0 g                                | 77             | <i>0.79</i> | <i>0.63 - 0.95</i> | 3105            | 0.79 | 0.67 | 0.46 | 0.39 | 112             | <i>0.84</i> | <i>0.75 - 0.93</i> | 3074            | 0.78 | 0.80 | 0.58 | 0.30 |
| <8.0 g                                | 72             | <i>0.74</i> | <i>0.51 - 0.97</i> | 3621            | 0.68 | 0.75 | 0.43 | 0.41 | 92              | <i>0.79</i> | <i>0.71 - 0.88</i> | 3657            | 0.65 | 0.83 | 0.49 | 0.39 |
| <9.0 g                                | 65             | <i>0.76</i> | <i>0.60 - 0.92</i> | 3621            | 0.72 | 0.73 | 0.46 | 0.38 | 72              | <i>0.75</i> | <i>0.66 - 0.83</i> | 3988            | 0.61 | 0.80 | 0.41 | 0.44 |
| <10.0 g                               | 55             | <i>0.79</i> | <i>0.67 - 0.90</i> | 4163            | 0.71 | 0.80 | 0.51 | 0.35 | 48              | <i>0.72</i> | <i>0.63 - 0.82</i> | 3996            | 0.67 | 0.73 | 0.40 | 0.43 |
| <11.0 g                               | 46             | <i>0.75</i> | <i>0.64 - 0.86</i> | 4255            | 0.70 | 0.71 | 0.40 | 0.42 | 28              | <i>0.70</i> | <i>0.59 - 0.81</i> | 4048            | 0.64 | 0.69 | 0.33 | 0.47 |
| <12.0 g                               | 30             | <i>0.70</i> | <i>0.59 - 0.82</i> | 4255            | 0.77 | 0.62 | 0.39 | 0.45 | 18              | <i>0.76</i> | <i>0.63 - 0.89</i> | 4674            | 0.67 | 0.82 | 0.48 | 0.38 |
| <13.0 g                               | 23             | 0.68        | 0.56 - 0.81        | 4255            | 0.74 | 0.56 | 0.30 | 0.51 | 10              | <i>0.73</i> | <i>0.58 - 0.87</i> | 3996            | 0.80 | 0.61 | 0.41 | 0.44 |
| <14.0 g                               | 16             | <i>0.71</i> | <i>0.56 - 0.85</i> | 4444            | 0.75 | 0.59 | 0.34 | 0.48 | 5               | 0.63        | 0.38 - 0.88        | 5351            | 0.40 | 0.88 | 0.28 | 0.61 |
| <15.0 g                               | 9              | <i>0.70</i> | <i>0.50 - 0.89</i> | 6074            | 0.56 | 0.82 | 0.37 | 0.48 | 3               | 0.76        | 0.44 - 1.00        | 5351            | 0.67 | 0.88 | 0.55 | 0.35 |
| <b>Potassium</b> <sup>c</sup>         |                |             |                    |                 |      |      |      |      |                 |             |                    |                 |      |      |      |      |
| ≥2000 mg                              | 7              | <i>0.82</i> | <i>0.66 - 0.99</i> | 1994            | 0.71 | 0.86 | 0.58 | 0.32 | 7               | <i>0.80</i> | <i>0.67 - 0.92</i> | 2814            | 1.00 | 0.60 | 0.60 | 0.40 |
| ≥2500 mg                              | 19             | <i>0.85</i> | <i>0.77 - 0.94</i> | 2679            | 0.84 | 0.72 | 0.56 | 0.32 | 36              | <i>0.78</i> | <i>0.70 - 0.87</i> | 2727            | 0.69 | 0.73 | 0.43 | 0.41 |
| ≥3000 mg                              | 34             | <i>0.77</i> | <i>0.67 - 0.88</i> | 2814            | 0.74 | 0.78 | 0.52 | 0.34 | 66              | <i>0.73</i> | <i>0.64 - 0.82</i> | 3190            | 0.77 | 0.59 | 0.36 | 0.47 |
| ≥3500 mg                              | 53             | <i>0.79</i> | <i>0.69 - 0.90</i> | 3091            | 0.72 | 0.85 | 0.57 | 0.32 | 93              | <i>0.82</i> | <i>0.73 - 0.91</i> | 3441            | 0.87 | 0.72 | 0.60 | 0.30 |
| ≥4000 mg                              | 69             | 0.69        | 0.51 - 0.86        | 3149            | 0.59 | 0.82 | 0.41 | 0.44 | 113             | <i>0.85</i> | <i>0.75 - 0.95</i> | 3569            | 0.82 | 0.89 | 0.71 | 0.21 |
| <b>Na/K ratio</b> <sup>d</sup>        |                |             |                    |                 |      |      |      |      |                 |             |                    |                 |      |      |      |      |
| <2.0                                  | 77             | <i>0.97</i> | <i>0.93 - 1.00</i> | 1.8             | 0.97 | 0.67 | 0.64 | 0.33 | 116             | <i>0.94</i> | <i>0.89 - 0.98</i> | 1.8             | 0.92 | 0.83 | 0.76 | 0.18 |
| <2.5                                  | 64             | <i>0.84</i> | <i>0.74 - 0.94</i> | 2.7             | 0.80 | 0.69 | 0.48 | 0.37 | 86              | <i>0.84</i> | <i>0.77 - 0.91</i> | 2.8             | 0.72 | 0.89 | 0.61 | 0.30 |
| <3.0                                  | 53             | <i>0.79</i> | <i>0.70 - 0.89</i> | 3.2             | 0.70 | 0.78 | 0.48 | 0.37 | 48              | <i>0.78</i> | <i>0.69 - 0.86</i> | 2.8             | 0.83 | 0.65 | 0.48 | 0.39 |
| <3.5                                  | 29             | <i>0.74</i> | <i>0.63 - 0.86</i> | 4.4             | 0.55 | 0.92 | 0.47 | 0.46 | 20              | <i>0.79</i> | <i>0.70 - 0.87</i> | 3.5             | 0.75 | 0.75 | 0.50 | 0.35 |
| <4.0                                  | 14             | <i>0.90</i> | <i>0.80 - 1.00</i> | 4.4             | 0.93 | 0.89 | 0.82 | 0.13 | 10              | <i>0.84</i> | <i>0.75 - 0.93</i> | 3.5             | 0.90 | 0.75 | 0.65 | 0.27 |
| <4.5                                  | 8              | <i>0.81</i> | <i>0.65 - 0.97</i> | 4.4             | 0.88 | 0.82 | 0.69 | 0.22 | 3               | <i>0.96</i> | <i>0.92 - 1.00</i> | 5.0             | 1.00 | 0.95 | 0.95 | 0.05 |

Abbreviations: AUC, area under the curve; CI, confidence interval; ROC, receiver-operating characteristics; WFR, weighed food records; CO, cut-off values; Se, sensitivity; Spe, specificity; YI, Youden's Index; DC, Distance to corner; Na/K ratio, sodium-to-potassium ratio.

Italic figures mean that the cumulative values of two or more measurements were also shown to be useful.

<sup>a</sup> Number of participants who deviated from the criterion based on WFR as reference measure; <sup>b</sup> Cut-off values were determined from Youden Index (sensitivity + specificity - 1) and distance to corner  $\{(1 - \text{sensitivity})^2 + (1 - \text{specificity})^2\}$ ; <sup>c</sup> 24-hour urinary potassium excretion was adjusted to the intake level by multiplying by 1.3; <sup>d</sup> Potassium intake by WFR used to calculate Na/K ratio, adjusted to the 24-hour urinary potassium excretion level by dividing by 1.3.

Table S2. AUC (95% CI) of the ROC curves by one-time 24-h urinary potassium excretion<sup>a</sup> to detect those with deviating intakes of fruit or vegetables measured by 12-day WFR using other criteria

| Criteria          | Men (n=80)     |             |                    |                 |      |      |      |      | Women (n=122)  |             |                    |                 |      |      |      |      |
|-------------------|----------------|-------------|--------------------|-----------------|------|------|------|------|----------------|-------------|--------------------|-----------------|------|------|------|------|
|                   | n <sup>b</sup> | AUC         | 95% CI             | CO <sup>c</sup> | Se   | Spe  | YI   | DC   | n <sup>b</sup> | AUC         | 95% CI             | CO <sup>c</sup> | Se   | Spe  | YI   | DC   |
| <b>Fruit</b>      |                |             |                    |                 |      |      |      |      |                |             |                    |                 |      |      |      |      |
| ≥ 50 g            | 29             | 0.59        | 0.46 - 0.73        | 2867            | 0.62 | 0.63 | 0.25 | 0.53 | 18             | <i>0.73</i> | <i>0.60 - 0.85</i> | 2727            | 0.78 | 0.67 | 0.45 | 0.40 |
| ≥100 g            | 46             | 0.65        | 0.53 - 0.77        | 2867            | 0.61 | 0.74 | 0.34 | 0.47 | 42             | 0.68        | 0.58 - 0.78        | 2779            | 0.64 | 0.71 | 0.36 | 0.46 |
| ≥150 g            | 60             | 0.62        | 0.48 - 0.75        | 2867            | 0.53 | 0.75 | 0.28 | 0.53 | 69             | 0.68        | 0.59 - 0.78        | 2867            | 0.59 | 0.75 | 0.35 | 0.47 |
| ≥200 g            | 70             | 0.61        | 0.41 - 0.80        | 3091            | 0.56 | 0.70 | 0.26 | 0.53 | 97             | 0.69        | 0.57 - 0.80        | 3353            | 0.77 | 0.56 | 0.33 | 0.50 |
| ≥250 g            | 76             | 0.64        | 0.27 - 1.00        | 4213            | 0.91 | 0.50 | 0.41 | 0.51 | 116            | 0.62        | 0.36 - 0.88        | 3353            | 0.72 | 0.67 | 0.39 | 0.43 |
| <b>Vegetables</b> |                |             |                    |                 |      |      |      |      |                |             |                    |                 |      |      |      |      |
| ≥200 g            | 8              | <i>0.79</i> | <i>0.65 - 0.93</i> | 2601            | 0.88 | 0.68 | 0.56 | 0.34 | 11             | 0.78        | 0.67 - 0.89        | 2814            | 0.91 | 0.61 | 0.52 | 0.40 |
| ≥250 g            | 23             | <i>0.77</i> | <i>0.65 - 0.90</i> | 2601            | 0.74 | 0.77 | 0.51 | 0.35 | 26             | 0.71        | 0.61 - 0.82        | 2903            | 0.73 | 0.63 | 0.36 | 0.46 |
| ≥300 g            | 28             | <i>0.79</i> | <i>0.68 - 0.90</i> | 2626            | 0.75 | 0.81 | 0.56 | 0.32 | 48             | 0.71        | 0.62 - 0.81        | 2903            | 0.67 | 0.69 | 0.36 | 0.46 |
| ≥350 g            | 44             | <i>0.77</i> | <i>0.66 - 0.87</i> | 3149            | 0.75 | 0.72 | 0.47 | 0.37 | 70             | 0.71        | 0.62 - 0.80        | 3348            | 0.86 | 0.52 | 0.38 | 0.50 |
| ≥400 g            | 51             | <i>0.72</i> | <i>0.60 - 0.83</i> | 2837            | 0.59 | 0.79 | 0.38 | 0.46 | 84             | <i>0.74</i> | <i>0.64 - 0.84</i> | 3348            | 0.83 | 0.61 | 0.44 | 0.43 |
| ≥450 g            | 60             | 0.69        | 0.55 - 0.83        | 3207            | 0.63 | 0.70 | 0.33 | 0.47 | 97             | <i>0.75</i> | <i>0.64 - 0.87</i> | 3348            | 0.79 | 0.68 | 0.47 | 0.38 |
| ≥500 g            | 67             | <i>0.75</i> | <i>0.59 - 0.92</i> | 3207            | 0.63 | 0.85 | 0.47 | 0.40 | 108            | <i>0.86</i> | <i>0.73 - 0.98</i> | 3466            | 0.82 | 0.86 | 0.68 | 0.23 |
| ≥550 g            | 70             | 0.69        | 0.50 - 0.88        | 3207            | 0.60 | 0.80 | 0.40 | 0.45 | 116            | <i>0.92</i> | <i>0.84 - 1.00</i> | 3680            | 0.82 | 0.83 | 0.65 | 0.25 |
| <b>Combined</b>   |                |             |                    |                 |      |      |      |      |                |             |                    |                 |      |      |      |      |
| ≥250 g            | 10             | <i>0.80</i> | <i>0.69 - 0.92</i> | 2434            | 0.80 | 0.79 | 0.59 | 0.29 | 11             | 0.73        | 0.61 - 0.85        | 2814            | 0.82 | 0.60 | 0.42 | 0.44 |
| ≥300 g            | 16             | <i>0.87</i> | <i>0.78 - 0.95</i> | 2601            | 0.94 | 0.77 | 0.70 | 0.24 | 15             | <i>0.77</i> | <i>0.67 - 0.87</i> | 2814            | 0.87 | 0.63 | 0.49 | 0.40 |
| ≥350 g            | 21             | <i>0.83</i> | <i>0.72 - 0.94</i> | 2626            | 0.86 | 0.78 | 0.64 | 0.26 | 22             | <i>0.79</i> | <i>0.70 - 0.88</i> | 2727            | 0.82 | 0.70 | 0.52 | 0.35 |
| ≥400 g            | 34             | <i>0.77</i> | <i>0.66 - 0.88</i> | 2679            | 0.68 | 0.78 | 0.46 | 0.39 | 41             | <i>0.81</i> | <i>0.73 - 0.89</i> | 2727            | 0.76 | 0.79 | 0.55 | 0.32 |
| ≥450 g            | 41             | <i>0.70</i> | <i>0.58 - 0.81</i> | 2837            | 0.63 | 0.74 | 0.38 | 0.45 | 54             | <i>0.77</i> | <i>0.69 - 0.85</i> | 2928            | 0.72 | 0.71 | 0.43 | 0.40 |
| ≥500 g            | 51             | 0.66        | 0.54 - 0.78        | 2867            | 0.59 | 0.76 | 0.35 | 0.48 | 66             | <i>0.75</i> | <i>0.66 - 0.83</i> | 3348            | 0.91 | 0.55 | 0.46 | 0.46 |
| ≥550 g            | 57             | <i>0.72</i> | <i>0.59 - 0.84</i> | 2979            | 0.63 | 0.83 | 0.46 | 0.41 | 83             | <i>0.70</i> | <i>0.59 - 0.80</i> | 3353            | 0.83 | 0.56 | 0.40 | 0.47 |
| ≥600 g            | 64             | <i>0.75</i> | <i>0.61 - 0.88</i> | 3149            | 0.64 | 0.88 | 0.52 | 0.38 | 94             | <i>0.75</i> | <i>0.63 - 0.87</i> | 3353            | 0.83 | 0.71 | 0.54 | 0.33 |
| ≥650 g            | 66             | <i>0.72</i> | <i>0.57 - 0.87</i> | 3149            | 0.62 | 0.86 | 0.48 | 0.40 | 106            | <i>0.82</i> | <i>0.69 - 0.95</i> | 3466            | 0.83 | 0.81 | 0.64 | 0.25 |
| ≥700 g            | 70             | 0.68        | 0.49 - 0.88        | 3149            | 0.59 | 0.80 | 0.39 | 0.46 | 110            | <i>0.87</i> | <i>0.76 - 0.99</i> | 3569            | 0.84 | 0.83 | 0.67 | 0.23 |
| ≥750 g            | 72             | 0.66        | 0.43 - 0.90        | 3530            | 0.75 | 0.63 | 0.38 | 0.45 | 116            | 0.80        | 0.62 - 0.97        | 3569            | 0.80 | 0.83 | 0.64 | 0.26 |
| ≥800 g            | 75             | 0.76        | 0.45 - 1.00        | 3904            | 0.85 | 0.80 | 0.65 | 0.25 | 118            | 0.76        | 0.50 - 1.00        | 3569            | 0.79 | 0.75 | 0.54 | 0.33 |

Abbreviations: AUC, area under the curve; CI, confidence interval; ROC, receiver-operating characteristics; WFR, weighed food records; CO, cut-off values; Se, sensitivity; Spe, specificity; YI, Youden's Index; DC, Distance to corner.

Italic figures mean that the cumulative values of two or more times also showed usefulness.

<sup>a</sup> 24-hour urinary potassium excretion was adjusted to the intake level by multiplying by 1.3; <sup>b</sup> Number of participants who deviated from the criterion based on WFR as reference measure; <sup>c</sup> Cut-off values were determined from Youden Index (sensitivity + specificity - 1) and distance to corner  $\{(1 - \text{sensitivity})^2 + (1 - \text{specificity})^2\}$ .
